# Supplementary material for: Expression levels of seven candidate genes in human peripheral blood mononuclear cells and their association with preeclampsia
Source: PubMed Central journal article supplement — Hypertens Pregnancy. 2013 Dec 2;33(2):191–203. doi: 10.3109/10641955.2013.853777 (PMC4017755; doi:10.3109/10641955.2013.853777), 2013-12-02
Supplement: HIP-33-191-s1.pdf [file HIP-33-191-s1.pdf]

## Supplementary Material

Table S1. Ct mean values obtained for the study genes using 100 ng of cDNA from HMEC-1 cell line.

| <b>Gene</b> | <b>Ct mean <math>\pm</math> SD*</b> |
|-------------|-------------------------------------|
| VEGF-A      | 28.90 $\pm$ 0.043                   |
| TGF-B1      | 24.76 $\pm$ 0.217                   |
| HMOX-1      | 29.26 $\pm$ 0.130                   |
| SOD-1       | 24.78 $\pm$ 0.104                   |
| IL-6        | 29.88 $\pm$ 0.130                   |
| IL-15       | 36.46 $\pm$ 0.003                   |
| Adipo-Q     | 37.00 $\pm$ 0.010                   |

\*SD = Standard deviation

## **General information and culture conditions of HMEC-1 cell line**

HMEC-1 is an immortalized human microvascular endothelial cell line that retains the morphologic, phenotypic, and functional characteristics of normal human microvascular endothelial cells [24]. This cell line was provided by the Biotechnology laboratory cell repository of the Biochemistry and Molecular Medicine Department of Universidad Autonoma de Nuevo Leon, Mexico. HMEC-1 cells were grown in DMEM supplemented with 10 % fetal bovine serum, 2 mM l-glutamine and penicillin/streptomycin (1 000 U/mL and 1000 µg/L respectively) and maintained at 37 °C in a humidified atmosphere of 5 % CO<sub>2</sub>. Monolayers were grown to confluence in 75 cm<sup>2</sup> culture flasks and were harvested in 0.25% trypsin/EDTA. After centrifugation, the cell pellets were rinsed with PBS 1X and consequently the RNA extraction was made using the Qiagen RNeasy® Mini Kit (Qiagen, West Sussex, UK). See material and methods section for RNA extraction and reverse transcription details.
